# Supplementary material for: Translation and Validation of the Spanish Version of the Banff Patellofemoral Instability Instrument 2.0
Source: PubMed Central journal article supplement (PMC11645779; doi:10.1177/23259671241298306), 2024-12-13
Supplement: sj-pdf-1-ojs-10.1177_23259671241298306.pdf [file sj-pdf-1-ojs-10.1177_23259671241298306.pdf]

# Instrumento de BANFF para Inestabilidad Patelofemoral 2.0

## Una Escala de Calidad de Vida para Pacientes con Inestabilidad Patelofemoral

**Nombre del Paciente** (nombre/apellido): \_\_\_\_\_

**Fecha** (día/mes/año): \_\_\_\_\_

| Nombre de su cirujano:         | Cuál rodilla le están viendo hoy?                                                                                                 | Esta visita es su:                                                                                                                                                                                                                                                                                          |
|--------------------------------|-----------------------------------------------------------------------------------------------------------------------------------|-------------------------------------------------------------------------------------------------------------------------------------------------------------------------------------------------------------------------------------------------------------------------------------------------------------|
| <input type="checkbox"/> _____ | <input type="checkbox"/> Rodilla derecha<br><input type="checkbox"/> Rodilla izquierda<br><input type="checkbox"/> Ambas rodillas | <input type="checkbox"/> Primera consulta / examen<br><input type="checkbox"/> Día de cirugía<br><input type="checkbox"/> 3 meses postoperatorio<br><input type="checkbox"/> 6 meses postoperatorio<br><input type="checkbox"/> 12 meses postoperatorio<br><input type="checkbox"/> 24 meses postoperatorio |

### **INSTRUCCIONES**

Por favor responda cada pregunta con respecto a su estado actual, función, circunstancias y creencias alrededor de la rodilla que tiene inestabilidad patelar. Considérelo para los últimos tres meses.

Indique con una barra oblicua ( / ) sobre la línea, el punto en el rango desde 0 hasta 100 que representa más cercanamente su situación.

Por ejemplo, la siguiente pregunta:

¿Este cuestionario es bueno?

0

Inútil

100

Fantástico

Si la barra oblicua fuera puesta en el centro de la línea, o en otras palabras, entre los extremos de 'inútil' y 'fantástico', esto indicaría que el cuestionario es considerado de calidad promedio. Es importante poner la barra oblicua al inicio o al final de la línea, si es que la descripción extrema refleja su situación.

## Sección A: Síntomas y Molestias Físicas

1. ¿Qué tan preocupado/a lo tiene que su patela “salga de pronto” o sea inestable?

**0** \_\_\_\_\_ **100**

Extremadamente preocupado/a

No le preocupa en absoluto

2. ¿Qué tanto dolor o molestia siente en la rodilla con cualquier tipo de actividad prolongada (más de media hora)? Por ejemplo: estar de pie, caminar, hacer deporte, etc.

**0** \_\_\_\_\_ **100**

Dolor severo

No hay dolor en absoluto

3. ¿Qué tanto dolor o molestia siente en la rodilla al estar sentado/a mucho tiempo (más de media hora)? Por ejemplo: en cine, manejando, etc.

**0** \_\_\_\_\_ **100**

Dolor severo

No hay dolor en absoluto

4. ¿Tiene alguna pérdida de movilidad en su rodilla?

**0** \_\_\_\_\_ **100**

Pérdida severa de movilidad

No hay pérdida de movilidad

5. ¿Qué tan débil se siente su rodilla?

**0** \_\_\_\_\_ **100**

Extremadamente débil

No hay debilidad en absoluto

## Sección B: Problemas Relacionados con el Trabajo y/o Escuela

\*\*Si no está trabajando debido a su rodilla, marque la barra oblicua en el extremo izquierdo de cada línea.

6. ¿Cuánta dificultad tiene debido a su rodilla con los movimientos de giro o pivote en el trabajo y/o escuela?

**0** \_\_\_\_\_ **100**

Extrema dificultad

No hay dificultad en absoluto

7. ¿Cuánta dificultad tiene al hacer sentadillas en el trabajo y/o escuela?

**0** \_\_\_\_\_ **100**

Extrema dificultad

No hay dificultad en absoluto

8. ¿Qué tanto le preocupa perder tiempo de trabajo y/o escuela debido al problema de su rodilla?

**0** \_\_\_\_\_ **100**

Extrema preocupación

No le preocupa en absoluto

9. ¿Se han creado dificultades financieras para usted o su familia por la lesión en la rodilla?

**0** \_\_\_\_\_ **100**

Severa dificultad financiera

No hay dificultad financiera

### Sección C: Recreación / Deporte / Actividad

10. ¿Qué tan preocupado/a está porque sus actividades deportivas y/o recreativas puedan empeorar su rodilla?

**0** \_\_\_\_\_ **100**

Extrema preocupación

No le preocupa en absoluto

11. ¿Al participar en actividad deportiva y/o recreativa debe hacerlo con precaución?  
(Marque con la barra oblicua el extremo de la izquierda, o sea 0, si es incapaz de participar en actividad recreativa o deportiva debido a su rodilla).

**0** \_\_\_\_\_ **100**

Siempre con precaución

Nunca con precaución

12. Cuando participa en actividad deportiva y/o recreativa ¿Qué tanto temor tiene a que la rodilla “salga de pronto”? (Marque con la barra oblicua el extremo de la izquierda, o sea 0, si es incapaz de participar en actividad recreativa o deportiva debido a su rodilla).

**0** \_\_\_\_\_ **100**

Temor extremo

No hay temor en absoluto

13. ¿Qué tanto le preocupa caminar sobre terreno irregular, una superficie húmeda o sobre hielo?

**0** \_\_\_\_\_ **100**

Extrema preocupación

No le preocupa en absoluto

14. ¿Es capaz de dar su máximo esfuerzo en sus actividades deportivas y/o recreativas? (Marque con la barra oblicua el extremo de la izquierda, o sea 0, si es incapaz de participar en actividad recreativa o deportiva debido a su rodilla).

**0** \_\_\_\_\_ **100**

Nunca es capaz

Siempre es capaz

## Sección D: Estilo de Vida

15. ¿Qué tanto le preocupan sus cuestiones generales de seguridad debido al problema de su rodilla? Por ejemplo: subir o bajar por las escaleras, manejar, cargar niños pequeños, etc.

**0** \_\_\_\_\_ **100**

Extrema preocupación

No le preocupa en absoluto

16. ¿Qué tanto se ha limitado su capacidad para ejercitarse y mantener la forma física debido al problema de su rodilla?

**0** \_\_\_\_\_ **100**

Totalmente limitada

No se ha limitado en absoluto

17. ¿Qué tanto se ha limitado para disfrutar la vida debido al problema de su rodilla?

**0** \_\_\_\_\_ **100**

Totalmente limitado/a

No se ha limitado en absoluto

18. ¿Evita actividades de estilo de vida con familia y/o amigos debido al problema de su rodilla?

**0** \_\_\_\_\_ **100**

Siempre lo evita

Nunca lo evita

19. ¿Debe planear más que su familia y/o amigos las actividades de estilo de vida y sociales debido al problema de su rodilla?

0

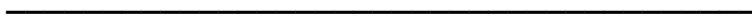

100

Siempre debe planear

Nunca debe planear

## Sección E: Social y Emocional

20. ¿Le frustra que sus necesidades recreativas o competitivas ya no se cumplan debido al problema de su rodilla? (Marque con la barra oblicua el extremo de la derecha, o sea 100, si sus necesidades competitivas se cumplen. Marque con la barra oblicua el extremo de la izquierda, o sea 0, si no tiene necesidades competitivas).

0



100

Extremadamente frustrado/a

No le frustra en absoluto

21. ¿Ha tenido dificultad para lidiar emocionalmente con el problema de su rodilla?

0

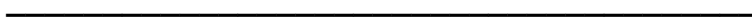

100

Extrema dificultad

No se dificulta en absoluto

22. ¿Qué tan a menudo está nervioso/a por su rodilla?

0



100

Siempre está nervioso/a

Nunca está nervioso/a

23. ¿Qué tan temeroso/a está de volver a lesionar su rodilla?

0

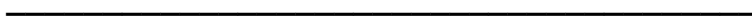

100

Extremadamente temeroso/a

No está temeroso/a en absoluto

**Gracias por responder este cuestionario.**
